# Supplementary material for: Review of recent advances in frequency-domain near-infrared spectroscopy technologies [Invited]
Source: PubMed Central journal article supplement (PMC10368025; doi:10.1364/boe.484044), 2023-06-12
Supplement: boe-14-7-3234-s001.pdf [file boe-14-7-3234-s001.pdf]

## Review of recent advances in frequency-domain near-infrared spectroscopy technologies [Invited]: supplement

**XINKAI ZHOU,<sup>1,†</sup> YUNJIA XIA,<sup>1,2,†</sup> JULIE UCHITEL,<sup>3,†</sup> LIAM COLLINS-JONES,<sup>2</sup> SHUFAN YANG,<sup>1,4</sup> RUI LOUREIRO,<sup>5</sup> ROBERT J. COOPER,<sup>2</sup> AND HUBIN ZHAO<sup>1,2,\*</sup> **

<sup>1</sup>*HUB of Intelligent Neuro-engineering (HUBIN), Aspire CREATE, IOMS, Division of Surgery and Interventional Science, University College London (UCL), London, HA7 4LP, UK*

<sup>2</sup>*DOT-HUB, Department of Medical Physics & Biomedical Engineering, UCL, London, WC1E 6BT, UK*

<sup>3</sup>*Department of Paediatrics, University of Cambridge, Cambridge, CB2 0QQ, UK*

<sup>4</sup>*School of Computing, Engineering & Build Environment, Edinburgh Napier University, Edinburgh, UK*

<sup>5</sup>*Aspire CREATE, Department of Orthopaedics & Musculoskeletal Science, UCL, London, HA7 4LP, UK*

<sup>†</sup>*These authors contributed equally to this work.*

\*[hubin.zhao@ucl.ac.uk](mailto:hubin.zhao@ucl.ac.uk)

---

This supplement published with Optica Publishing Group on 12 June 2023 by The Authors under the terms of the [Creative Commons Attribution 4.0 License](https://creativecommons.org/licenses/by/4.0/) in the format provided by the authors and unedited. Further distribution of this work must maintain attribution to the author(s) and the published article's title, journal citation, and DOI.

Supplement DOI: <https://doi.org/10.6084/m9.figshare.23274446>

Parent Article DOI: <https://doi.org/10.1364/BOE.484044>

# Supplementary Document to - Review of recent advances in frequency-domain near-infrared spectroscopy technologies

## List of abbreviations

|              |                                         |
|--------------|-----------------------------------------|
| <b>AFE</b>   | analog front-end                        |
| <b>APD</b>   | avalanche photodiode                    |
| <b>BLL</b>   | beer-lambert law                        |
| <b>CBF</b>   | cerebral blood flow                     |
| <b>CBV</b>   | cerebral blood volume                   |
| <b>CMOS</b>  | complementary metal-oxide semiconductor |
| <b>CPAP</b>  | continuous positive airway pressure     |
| <b>CW</b>    | continuous-wave                         |
| <b>DAQ</b>   | data acquisition                        |
| <b>DCS</b>   | diffuse correlation spectroscopy        |
| <b>DDS</b>   | direct digital synthesizer              |
| <b>DOS</b>   | diffuse optical spectroscopy            |
| <b>DOT</b>   | diffuse optical tomography              |
| <b>DSS</b>   | digital synthesis system                |
| <b>ECMO</b>  | extracorporeal membrane oxygenation     |
| <b>EEG</b>   | electroencephalography                  |
| <b>EEL</b>   | edge-emitting laser                     |
| <b>FD</b>    | frequency-domain                        |
| <b>fNIRS</b> | functional NIRS                         |
| <b>FDPM</b>  | frequency domain photon migration       |
| <b>FPGA</b>  | field-programmable gate array           |
| <b>GSPS</b>  | gigasample per second                   |
| <b>HbO</b>   | oxy-hemoglobin                          |
| <b>HbR</b>   | deoxy-haemoglobin                       |
| <b>HBT</b>   | heterojunction bipolar transistor       |
| <b>HbT</b>   | total hemoglobin                        |

|                         |                                             |
|-------------------------|---------------------------------------------|
| <b>IC</b>               | integrated circuit                          |
| <b>KNN</b>              | k-nearest neighbor                          |
| <b>LUT</b>              | look-up table                               |
| <b>MOSFET</b>           | metal oxide silicon field effect transistor |
| <b>MSPS</b>             | megasamples per second                      |
| <b>NEP</b>              | noise equivalent power                      |
| <b>NIR</b>              | near infrared                               |
| <b>NIRS</b>             | near-infrared spectroscopy                  |
| <b>OEF</b>              | oxygen extraction fraction                  |
| <b>PbtO<sub>2</sub></b> | cerebral tissue oxygen tension              |
| <b>PCB</b>              | printed circuit board                       |
| <b>PD</b>               | photodiode                                  |
| <b>PDC</b>              | phase-to-digital converter                  |
| <b>PLL</b>              | phase-locked-loop                           |
| <b>PMT</b>              | photo-multiplier tube                       |
| <b>rcSO<sub>2</sub></b> | cerebral oxygen saturation                  |
| <b>RF</b>               | radiofrequency                              |
| <b>SCM</b>              | sternocleidomastoid                         |
| <b>SDS</b>              | source-detector separation                  |
| <b>SiGe</b>             | silicongermanium                            |
| <b>SiPM</b>             | silicon photomultiplier                     |
| <b>SNR</b>              | signal-to-noise ratio                       |
| <b>SOC</b>              | system on a chip                            |
| <b>SPAD</b>             | single-photon avalanche diode               |
| <b>tDCS</b>             | transcranial direct current stimulation     |
| <b>TD-NIRS</b>          | time-domain NIRS                            |
| <b>TIA</b>              | transimpedance amplifiers                   |
| <b>TOBI</b>             | tomographic optical breast imaging          |
| <b>TTL</b>              | transistor–transistor logic (missing)       |
| <b>VCSEL</b>            | vertical-cavity surface-emitting laser      |
| <b>VGA</b>              | variable gain                               |

Table S1. Sources and Detectors Employed in Reviewed FD-NIRS Technologies.

| Author, Year                   | Source Brand     | Source Type  | Part No. of Source  | Light density of Source (mW) | Size of Source        | Power consumption of Source | Detector Brand | Detector Type | Part No. of Detector | Photo-sensitive area of Detector | Size of Detector                   | Power consumption of Detector | Wavelength                                |
|--------------------------------|------------------|--------------|---------------------|------------------------------|-----------------------|-----------------------------|----------------|---------------|----------------------|----------------------------------|------------------------------------|-------------------------------|-------------------------------------------|
| Campbell et al., 2020 [21]     | -                | LD           | -                   | -                            | -                     | -                           | Hamamatsu      | APD           | S12060-10            | Φ1 mm                            | Φ5.4 × 3.7 mm <sup>2</sup>         | -                             | 631, 660, 689, 782, 828, 849 nm           |
| Choe et al., 2009 [23]         | -                | LD           | -                   | -                            | -                     | -                           | -              | APD           | -                    | -                                | -                                  | -                             | 681, 783, 823, 850 nm                     |
| Zhang et al., 2005 [24,25]     | -                | LD           | -                   | -                            | -                     | -                           | Hamamatsu      | APD           | C5331-04             | Φ3 mm                            | 80 × 45 × 19.6 mm                  | -                             | -                                         |
| El-Ghoussein et al., 2013 [27] | -                | LD           | -                   | 2-5                          | -                     | -                           | Hamamatsu      | PMT           | H9305-3              | 3.7 mm × 13 mm                   | 53.2 × 50.8 × 19 mm <sup>3</sup>   | 126 mW                        | 660, 735, 785, 808, 826, 849 nm           |
| Carp et al., 2017 [29]         | -                | LD           | -                   | 14, 10                       | -                     | -                           | Hamamatsu      | PMT           | R9880U-01            | Φ8mm                             | Φ16 × 12.4 mm <sup>2</sup>         | -                             | 670, 690, 700, 730, 760, 780, 810, 830 nm |
| Mackey et al., 2020 [30]       | -                | LD           | -                   | -                            | -                     | -                           | -              | PMT           | -                    | -                                | -                                  | -                             | -                                         |
| Lee et al., 2022 [31]          | -                | -            | -                   | -                            | -                     | -                           | -              | -             | -                    | -                                | -                                  | -                             | 785, 824 nm                               |
| Huang et al., 2017 [32]        | Amplitude System | Yb-YAG laser | Mikan               | -                            | -                     | -                           | Hamamatsu      | APD Module    | C5658                | Φ0.5mm/Φ3mm(in vivo)             | 28 × 50 × 60 mm <sup>2</sup>       | 1.2W                          | 700, 750, 800, 1030 nm                    |
| Zimmermann et al., 2016 [33]   | Thorlabs         | LD           | HL6750MG/HL8338MG   | 12.5                         | -                     | 50 mW                       | Hamamatsu      | APD Module    | C5331-04             | Φ3 mm                            | 80 × 45 × 19.6 mm <sup>3</sup>     | -                             | 685, 830 nm                               |
| Thompson et al., 2021 [34]     | Thorlabs         | LD           | HL6738MG/L852P50    | 12.5                         | Φ5.6 × 2.3mm          | -                           | Thorlabs       | APD Module    | APD430 A             | Φ0.5 mm                          | 50.8 × 63.5 × 25.4 mm <sup>3</sup> | 3 mW                          | 690 nm, 852 nm                            |
| Wathen et al., 2021 [36]       | Thorlabs         | LD           | HL6738MG/L852P50    | 10                           | Φ5.6 × 2.3mm          | -                           | onseni         | SiPM          | MicroRB-10020        | Φ0.5 mm                          | 50.8 × 63.5 × 25.4 mm <sup>3</sup> | 3 mW                          | 690, 852 nm                               |
| Chen et al., 2004 [40]         | -                | LD           | -                   | -                            | -                     | -                           | Hamamatsu      | APD           | S3884                | Φ1.5 mm                          | Φ9.1 × 4.7mm <sup>2</sup>          | -                             | 660, 780, 830nm                           |
| O'Sullivan et al., 2017 [42]   | Vixar/Thorlabs   | VCSEL / EEL  | (VCSEL)/LD 808-SA60 | 11.6-17.8                    | -                     | 155(Array)/143 (Single) mW  | Hamamatsu      | APD           | S6045-05             | Φ3 mm                            | Φ9.1 × 4.2 mm <sup>2</sup>         | -                             | 680, 795, 850 nm                          |
| Torjensen et al., 2017 [46]    | Thorlabs         | LD Module    | LDM9T               | 50                           | 78.5 × 73.3 × 45.5 mm | 12 W                        | Hamamatsu      | APD Module    | C5658                | Φ0.5 mm/ Φ3 mm (in vivo)         | 28 × 50 × 60 mm <sup>3</sup>       | 1.2 W                         | 658, 690, 785, 808, 830, 850 nm           |

|                             |                                      |           |                                                        |                  |                                    |             |           |             |             |         |                                    |      |                                 |
|-----------------------------|--------------------------------------|-----------|--------------------------------------------------------|------------------|------------------------------------|-------------|-----------|-------------|-------------|---------|------------------------------------|------|---------------------------------|
| Isfahan et al., 2019 [50]   | Vixar                                | VCSEL     | (Custom)                                               | 1.2-7.84         | Φ5 mm                              | -           | Hamamatsu | Compact APD | S13282-01CR | Φ0.2 mm | 5.3 × 3.0 × 1.2 mm <sup>3</sup>    | -    | 660, 680, 775, 795 nm           |
| Applegate et al., 2021 [51] | -                                    | LD        | -                                                      | -                | -                                  | -           | Hamamatsu | APD         | S11519-30   | Φ3mm    | Φ13.9 × 4.9 mm <sup>2</sup>        | -    | 690, 730, 785, 808, 830, 850 nm |
| Stillwell et al., 2021 [58] | Thorlabs/Vixar                       | EEL/VCSEL | HL6738MG, L785P090, L808P200, L850P030, L980P030       | 35-100 (Factory) | Φ5.6 × 3.5 mm <sup>2</sup> (EEL)   | 240mW (EEL) | Hamamatsu | APD         | S2384       | Φ3mm    | Φ9.1 × 4.2 mm <sup>2</sup>         | -    | 690, 785, 808, 850, 940 980 nm  |
| Miao et al., 2018 [63]      | Thorlabs                             | LD        | HL8338MG/L785P090/H L6750MG                            | 2.5              | Φ5.6×2.3mm <sup>2</sup> for all    | -           | Hamamatsu | APD         | S9251-15    | Φ1.5mm  | Φ9.1 × 4.2 mm <sup>2</sup>         | -    | 685, 785, 830 mm                |
| Kılıç et al., 2022 [64]     | Thorlabs                             | LD        | HL6750MG/HL8338MG                                      | -                | -                                  | 50 mW       | Hamamatsu | APD         | S9251-15    | Φ1.5mm  | Φ5.4 × 3.6 mm <sup>2</sup>         | -    | 690, 830 nm                     |
| Yazdi et al., 2017 [65]     | Bluesky Research/Thorlabs/Qphotonics | LD        | VP5L0690-035X5A, VP5L0830-050X5A/L785P090/QLD-980-150S | 35-50, (Factory) | Φ5.6×3.5mm <sup>2</sup> (Thorlabs) | 240 mW      | Hamamatsu | APD         | S12023-02   | Φ0.2mm  | Φ5.4 × 3.7 mm <sup>2</sup>         | -    | 690, 785, 830, 980 nm           |
| Chen et al., 2022 [66]      | Thorlabs                             | LD        | HL6750MG                                               | -                | -                                  | 50 mW       | Hamamatsu | APD         | C12703      | Φ1.5mm  | 80 × 50 × 21.6 mm <sup>3</sup>     | -    | 685 nm                          |
| Koh et al., 2022 [67]       | -                                    | VCSEL     | -                                                      | -                | -                                  | -           | -         | APD Module  | -           | -       | -                                  | -    | -                               |
| Scammon, 2022 [68]          | Thorlabs                             | LD        | L785P25                                                | 25 (Factory)     | Φ5.6 × 2.3mm                       | -           | Thorlabs  | APD Module  | APPD430 A   | Φ0.5 mm | 50.8 × 63.5 × 25.4 mm <sup>3</sup> | 3 mW | 785 nm                          |

**Table S2. Phase Measurement Components Employed in Reviewed FD-NIRS Technologies.**

| Author, Year                 | Brand                | Name                                         | Part Number               | Components Frequency Range | Number of Measurement channels | Size of Component         |
|------------------------------|----------------------|----------------------------------------------|---------------------------|----------------------------|--------------------------------|---------------------------|
| Campbell et al., 2020 [21]   | Agilent              | Network Analyzer                             | 8753ES                    | 30kHz-3GHz                 | 1                              | 222 mm × 425 mm × 457 mm  |
| Choe et al., 2009 [23]       | -                    | -                                            | -                         | -                          | -                              | -                         |
| Zhang et al., 2005 [24,25]   | -                    | I/Q Demodulator with PC                      | -                         | -                          | -                              | -                         |
| El-Ghussen et al., 2013 [27] | National Instruments | PC with signal down converted (With DAQ)     | PCI 6031E                 | -                          | -                              | DAQ, 307 × 254 × 43 mm    |
| Carp et al., 2017 [29]       | -                    | PC with signal down converted                | -                         | -                          | -                              | -                         |
| Mackey et al., 2020 [30]     | -                    | PC with signal down converted                | -                         | -                          | -                              | -                         |
| Lee et al., 2022 [31]        | -                    | PC with signal down converted                | -                         | -                          | -                              | -                         |
| Huang et al., 2017 [32]      | Stanford Research    | Lock-in Amplifier with signal down converted | SR830                     | 1 MHz                      | 1                              | -                         |
| Zimmermann et al., 2016 [33] | Xilinx               | FPGA (With PC)                               | Spartan-6 LX9/(MATLAB)    | -                          | 1                              | FPGA, < 20mm × 20 mm      |
| Thompson et al., 2021 [34]   | -                    | PC with signal down converted                | -                         | -                          | 12                             | -                         |
| Wathen et al., 2021 [36]     | -                    | PC with signal down converted                | -                         | -                          | 32                             | -                         |
| Chen et al., 2004 [40]       | -                    | PC with signal down converted                | -                         | -                          | -                              | -                         |
| O'Sullivan et al., 2017 [42] | -                    | Network analyzer                             | -                         | 50 - 500 MHz               | -                              | -                         |
| Torjesen et al., 2017 [46]   | MircroZed            | FPGA SoC Platform (With PC)                  | Xilinx Zynq-7010/(MATLAB) | -                          | 1                              | FPGA, 10×6cm <sup>2</sup> |
| Istifan et al., 2019 [50]    | Agilent              | Network Analyzer                             | E5061B                    | 100 kHz - 3 GHz            | 1                              | -                         |
| Applegate et al., 2021 [51]  | MircroZed            | FPGA SoC Platform (With PC)                  | Xilinx Zynq /(MATLAB)     | -                          | -                              | -                         |
| Stillwell et al., 2021 [58]  | Krtkl Snickerdoodle  | FPGA SoC Platform                            | Xilinx Zynq 7020          | -                          | 1                              | FPGA, 88.9×50.8 mm        |
| Miao et al., 2018 [63]       | -                    | 130nm Custom Chip with PC                    | -                         | 80MHz                      | 1                              | 2.25 mm <sup>2</sup>      |
| Kılıç et al., 2022 [64]      | -                    | PC with signal pre-processing on custom chip | -                         | 80MHz                      | 1                              | -                         |
| Yazdi et al., 2017 [65]      | -                    | 180nm Custom chip                            | -                         | 50-1000MHz                 | 1                              | ~5 × 5 mm                 |
| Chen et al., 2022 [66]       | -                    | 180nm Custom chip                            | -                         | 10MHz                      | 1                              | -                         |
| Koh et al., 2022 [67]        | -                    | 180nm Custom chip                            | -                         | 150MHz                     | 1                              | FD part, 2.5mm × 2.5 mm   |
| Scammon, 2022 [68]           | Xilinx               | FPGA SoC Platform (With PC)                  | ZCU102                    | -                          | 1                              | -                         |
